# Supplementary material
Source: PubMed Central journal article supplement (PMC1200286)

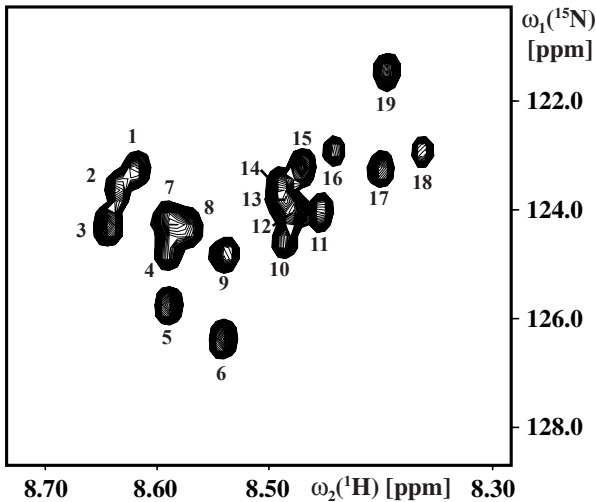

Supplement: pnas_0505642102_1.pdf [file pnas_0505642102_1.pdf]
